# Supplementary material
Source: publisher site journal article supplement (https://www.spandidos-publications.com/2789/downloadSupplementary)

Figure S1. Inhibitory effect of siSOX9. The transfection efficiency of siRNA was determined by performing (A) western blotting and (B) reverse transcription-quantitative PCR (n=4). \*P<0.05 vs. NC. si, small interfering RNA; NC, negative control.

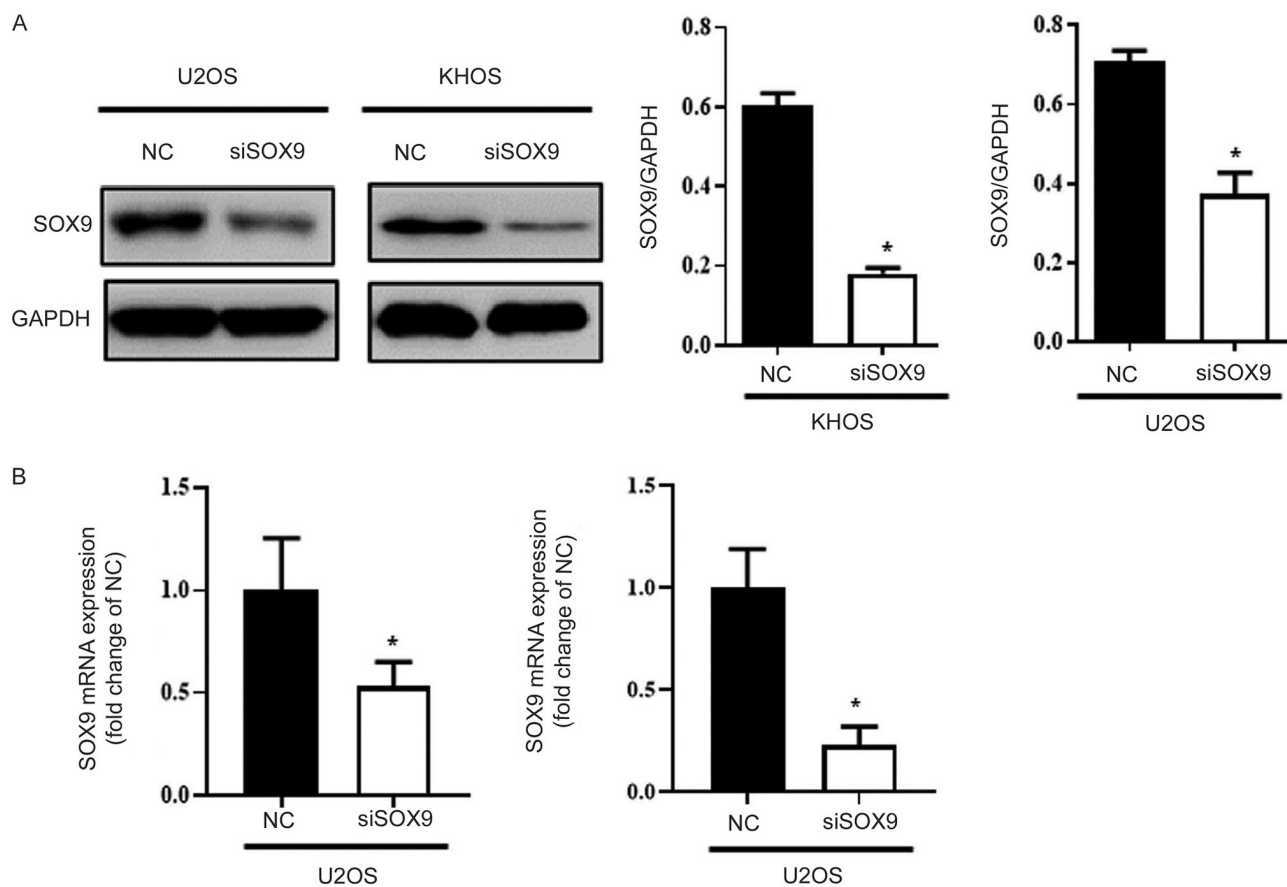

Figure S2. OA treatment does not inhibit non-tumor osteoblastic cell viability, proliferation, migration and invasion. (A) OA did not alter osteosarcoma cell viability, as determined by performing the Cell Counting Kit-8 assay (n=8). (B) OA did not alter osteosarcoma cell colony formation. Cell colonies were stained using crystal violet and observed under a microscope (magnification, x40; n=5). (C) Ki67 staining of osteosarcoma cells cultured with or without OA treatment (scale bar, 40  $\mu$ m; n=5). Cell migration and invasion were assessed by performing (D) wound healing and (E) Transwell assays, respectively (magnification, x100; n=5). OA, oleanolic acid; Ctrl, control.

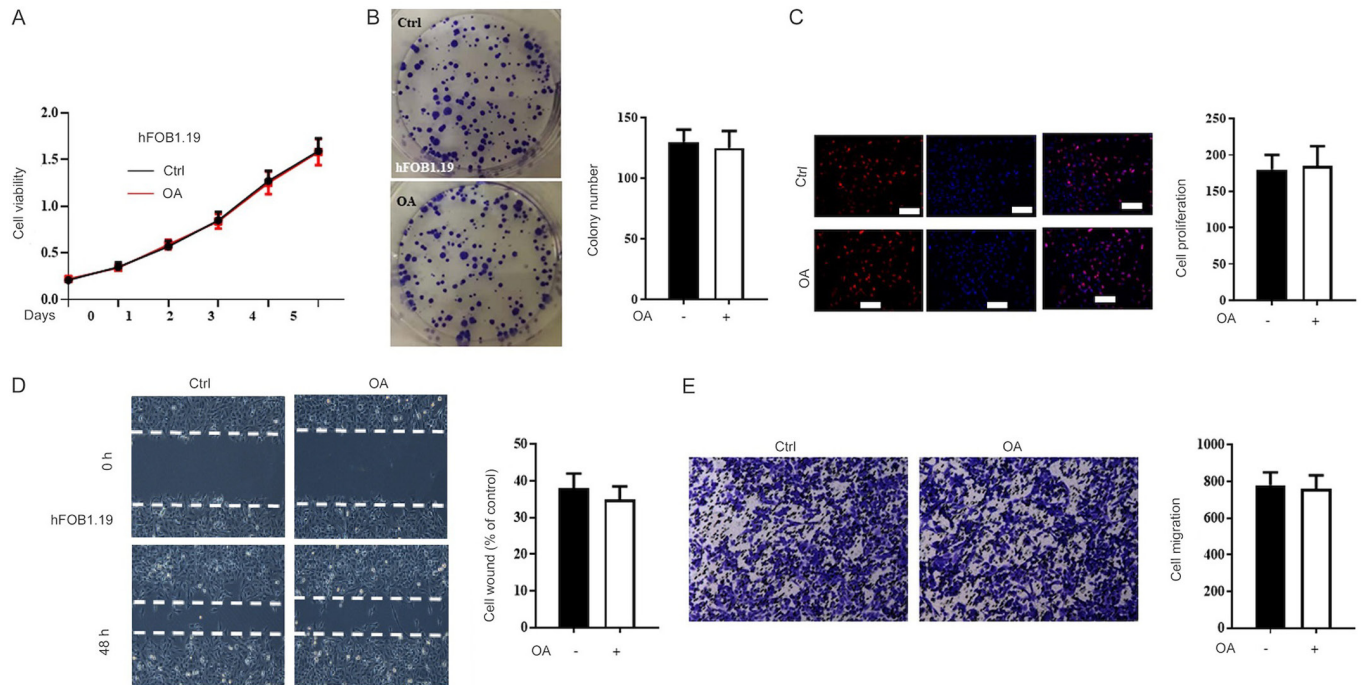

Supplement: Supplementary file 1 [file downloadSupplementary]
